# Supplementary material
Source: PubMed Central journal article supplement (PMC3077992)
Supplement: NIHMS183810-supplement-Figure_legends.pdf [file NIHMS183810-supplement-Figure_legends.pdf]

## **Figure Legends**

***Iwasa JH, Mullins RD. (2007) Spatial and temporal relationships between actin-filament nucleation, capping, and disassembly.***

1. Document S1. Five Figures and One Table (PDF 1599 kb)
2. Movie S1. GFP-Actin Speckle Movement in an S2 Cell (AVI 1517 kb)  
Images were taken at 1 frame/3 s over approximately 3 min.
3. Movie S2. GFP-p16 Speckle Movement in an S2 Cell (AVI 1748 kb)  
Images were taken at 1 frame/3 s over approximately 3 min.
4. Movie S3. GFP-CPA Speckle Movement in an S2 Cell (AVI 2252 kb)  
Images were taken at 1 frame/s for approximately 1.5 min.
5. Movie S4. GFP-cTm Speckle Movement in an S2 Cell (AVI 2166 kb)  
Images were taken at 1 frame/3 s over approximately 3 min.
